# Supplementary material for: Nanoscale characterization illustrates the cisplatin-mediated biomechanical changes of B16-F10 melanoma cells
Source: Royal Society of Chemistry journal article supplement (doi:10.1039/c5cp07971c), 2016-01-01
Supplement: c5cp07971c1.pdf [file c5cp07971c1.pdf]

Supplementary data

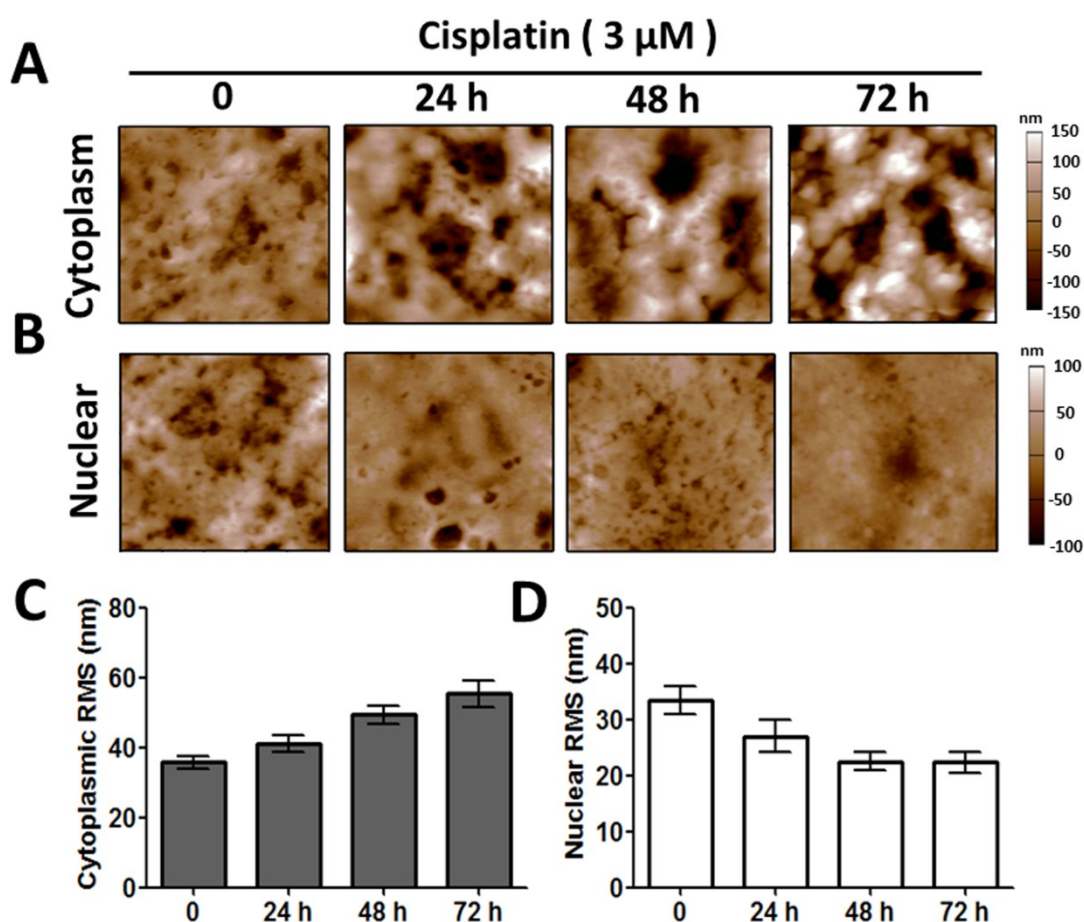

**Fig. S1.** Long term effects of cisplatin on the nuclear and cytoplasmic surface roughness. After the B16-F10 cells were treated with cisplatin (3  $\mu$ M) for several time intervals (0, 24 h, 48 h and 72h), ultrastructures of the cytoplasm (A) and nucleus (B) were determined from the AFM topographical images. The changes in the RMS roughness of the cytoplasm and nucleus are recorded and quantified. These results show that the membrane surface RMS roughness of the cytoplasmic region are  $36 \pm 3.5$ ,  $41 \pm 4.8$ ,  $49 \pm 5.3$ , and  $55 \pm 7.8$  nm at 0, 24 h, 48 h, and 72 h of cisplatin treatment, respectively (C). For nuclear region, the RMS values revealed a downward trend ( $27 \pm 5.6$ ,  $23 \pm 3.1$  and  $22 \pm 3.6$  nm at 0, 24 h, 48 h, and 72 h of cisplatin treatment, respectively) as comparing to control ( $33 \pm 5.2$  nm). (D). Image size in (A) and (B) is  $5 \times 5 \mu\text{m}^2$ . The height values were obtained from at least 10 cells and the bars in (C) and (D) represent the mean  $\pm$  S.D.;  $p < 0.005$ .
